# Supplementary material
Source: PubMed Central journal article supplement (PMC3359115)
Supplement: supp_215.12.2013_JEB069468tableS1.pdf [file supp_215.12.2013_JEB069468tableS1.pdf]

Table S1. Raw means (main table entries) and standard errors (in parentheses) of dry body mass of mosquitoes measured in this study

| Sample location | Sex and female gonotrophic state | Sampling period |               |               |               |               |
|-----------------|----------------------------------|-----------------|---------------|---------------|---------------|---------------|
|                 |                                  | Oct-Nov         | Dec           | Jan-Feb       | Apr-May       | Jul-Aug       |
| Sahelian (MP)   | Male                             | 0.194 (0.016)   | 0.196 (0.004) | 0.200 (0.005) | 0.201 (0.014) | 0.174 (0.006) |
|                 | Unfed Female                     | 0.288 (0.020)   | 0.287 (0.040) | 0.290 (0.017) | 0.218 (0.014) | 0.230 (0.015) |
|                 | Fed Female                       | 0.743 (0.056)   | 0.994 (n/a)   | 0.965 (0.359) | 0.760 (0.065) | n/a           |
|                 | Gravid Female                    | 0.481 (0.041)   | 0.437 (0.247) | 0.438 (0.077) | 0.523 (0.059) | 0.269 (0.023) |
| Riparian (NG)   | Male                             | 0.200 (0.011)   | 0.180 (0.008) | 0.203 (0.006) | 0.160 (0.008) | 0.191 (0.017) |
|                 | Unfed Female                     | 0.241 (0.013)   | 0.230 (0.016) | 0.220 (0.022) | 0.200 (0.011) | 0.237 (0.017) |
|                 | Fed Female                       | 0.850 (0.056)   | 1.059 (0.352) | 0.890 (n/a)   | 0.386 (0.056) | n/a           |
|                 | Gravid Female                    | 0.548 (0.030)   | 0.371 (0.081) | 0.364 (0.043) | 0.415 (0.069) | 0.301 (0.024) |

Sampling periods are defined as in all other tables and figures. For the mean; n/a indicates that no individuals of that gonotrophic state were collected during that sampling period; while for the standard error; n/a indicates that only 1 individual was measured.
